# Supplementary material for: Sub-wavelength acoustic stencil for tailored micropatterning
Source: Royal Society of Chemistry journal article supplement (doi:10.1039/d3lc00043e), 2023-01-01
Supplement: d3lc00043e6.pdf [file d3lc00043e6.pdf]

## Electronic Supplementary Information

### Sub-wavelength acoustic stencil for tailored micropatterning

Kirill Kolesnik,<sup>a</sup> Philipp Segeritz,<sup>ab</sup> Daniel J. Scott,<sup>bc</sup> Vijay Rajagopal,<sup>a</sup> David J Collins <sup>\*ad</sup>

<sup>a.</sup> *Department of Biomedical Engineering, The University of Melbourne, Parkville, VIC 3010, Victoria, Australia.*

<sup>b.</sup> *The Florey Institute of Neuroscience and Mental Health, The University of Melbourne, 30 Royal Parade, Parkville, VIC 3052, Australia.*

<sup>c.</sup> *Department of Biochemistry and Pharmacology, The University of Melbourne, Parkville, VIC 3010, Australia.*

<sup>d.</sup> *The Graeme Clark Institute, The University of Melbourne, Parkville, VIC, 3010, Australia.*

*\*Corresponding author:* David J Collins

E-mail: david.collins@unimelb.edu.au

### Supplementary Materials

#### The PDF file includes:

Fig. S1 to S8

Legends for Movies S1 to S5

Note S1 to S3

Table S1 to S2

References

#### Other Supplementary Materials for this manuscript include the following:

Movies S1 to S5

Supplementary Figures

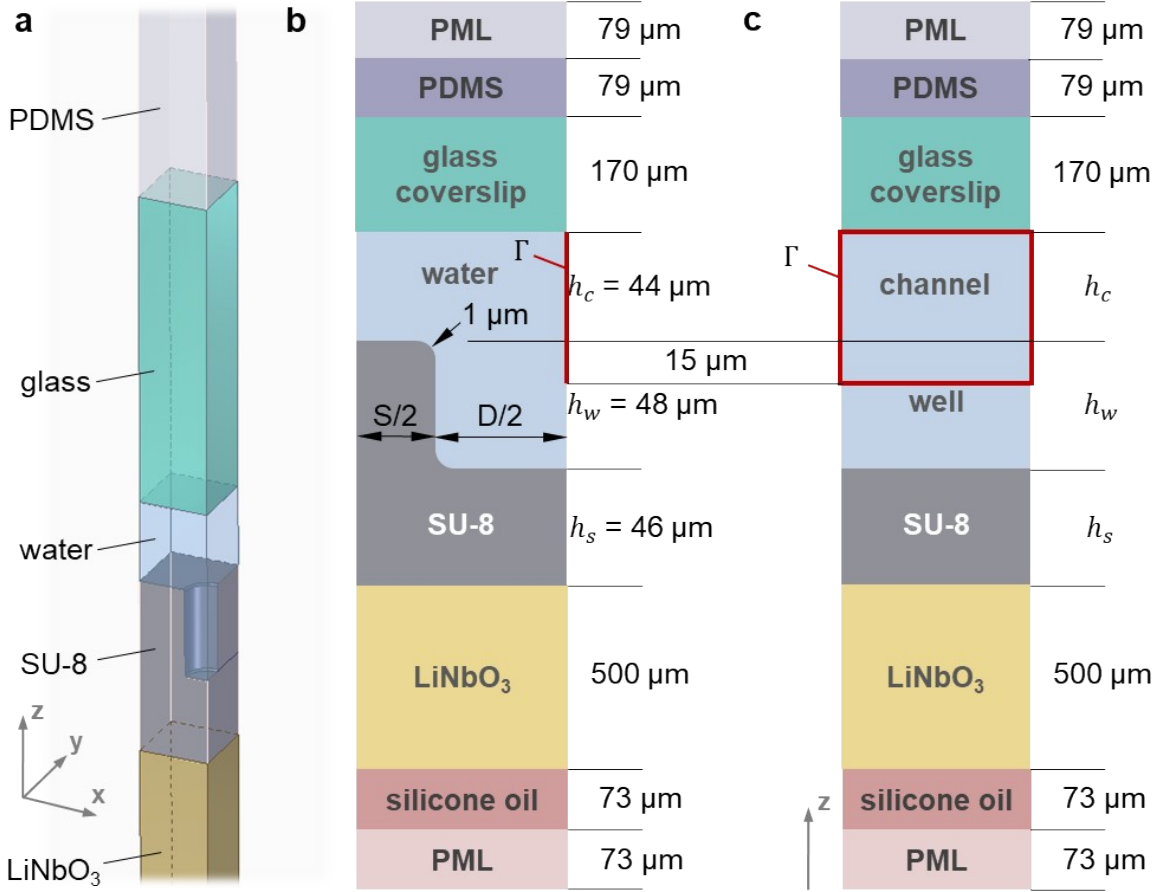

Fig. S1 Numerical simulation domains (a) The periodic structure with a quarter-microwell for the 3D study. (b) 3D computational domain cross-section ( $x$ - $z$  view). (c) 1D simulation domain

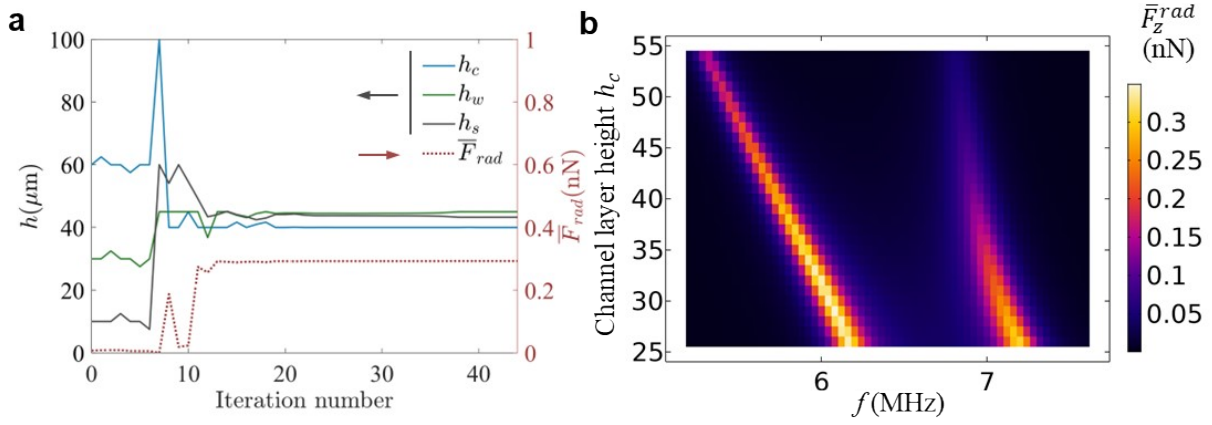

Fig. S2 Numerical analysis results. (a) Iterative numerical optimization using 1D model. (b) Averaged radiation force for domains of variable water layer height above the microwells and applied frequency  $f$ , showing both channel (left) and transducer (right) resonance peaks. Microwells in the parametric study have diameter  $D = 35 \mu\text{m}$  and spacing  $S = 15 \mu\text{m}$ .

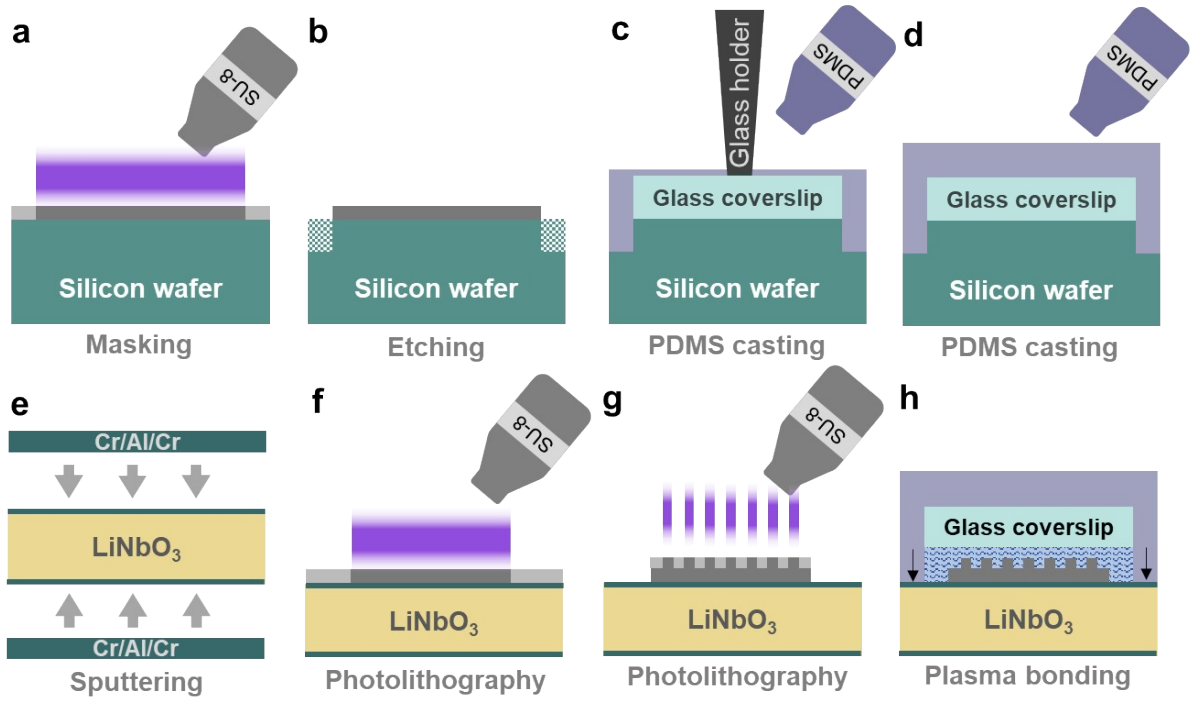

Fig. S3 Schematic depiction of microfluidic device fabrication steps, performed sequentially from a to h.

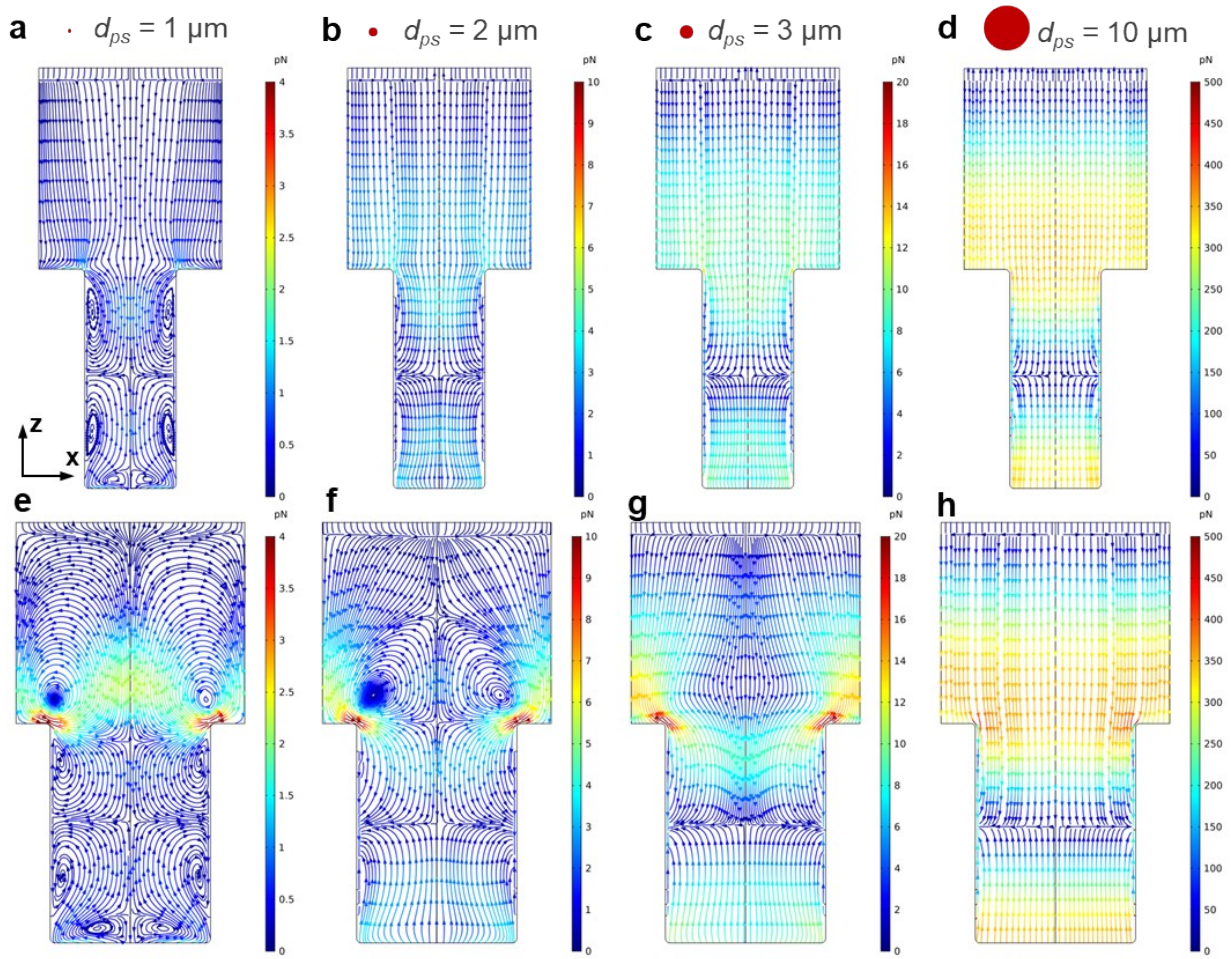

Fig. S4 Combined acoustic radiation and acoustic streaming-induced force and particle trajectories calculated for different particle sizes  $d_{ps} = 1 \mu m$  (a, e),  $d_{ps} = 2 \mu m$  (b, f),  $d_{ps} = 3 \mu m$  (c, g),  $d_{ps} = 10 \mu m$  (d, h) with  $D = 20 \mu m$   $S = 20 \mu m$  (top row) and  $D = 35 \mu m$ ,  $S = 15 \mu m$  (bottom row).

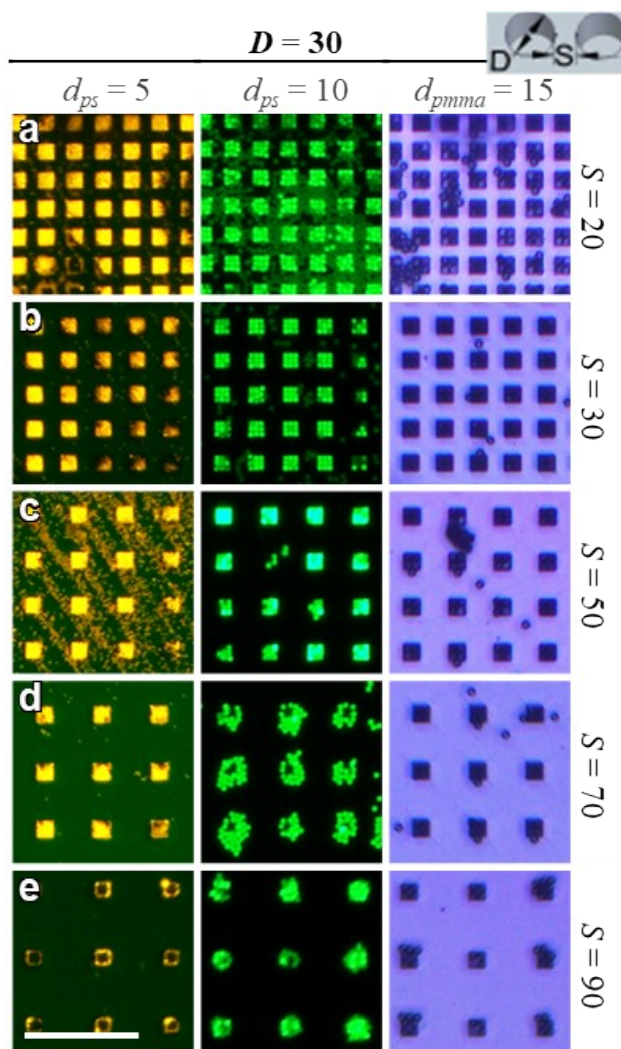

Fig. S5 Experimental particle trapping in square periodic cavities with width  $D = 30 \mu\text{m}$  and different spacing  $S$ . Rows (a-e) denote increasing  $S$ , with  $S = 20, 30, 50, 70$  and  $90 \mu\text{m}$ , respectively, in which  $5 \mu\text{m}$  (yellow polystyrene),  $10 \mu\text{m}$  (green polystyrene) and  $15 \mu\text{m}$  non-fluorescent PMMA) particles are patterned. The actuation frequency is  $5.8 \text{ MHz}$  and driving voltage is  $V_1 = 20 \text{ V}$ . Sizes are in  $\mu\text{m}$ . Scale bar is  $200 \mu\text{m}$ .

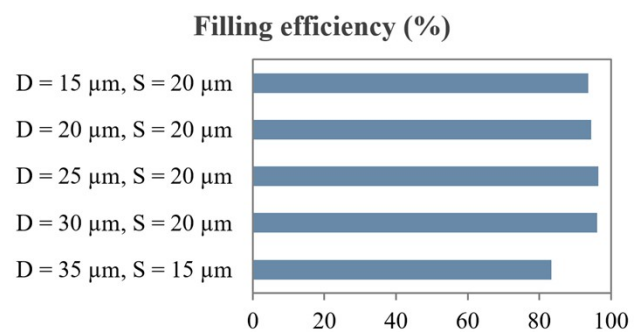

Fig. S6 The filling efficiency of circular microwells seeded with 15 μm PMMA microparticles.

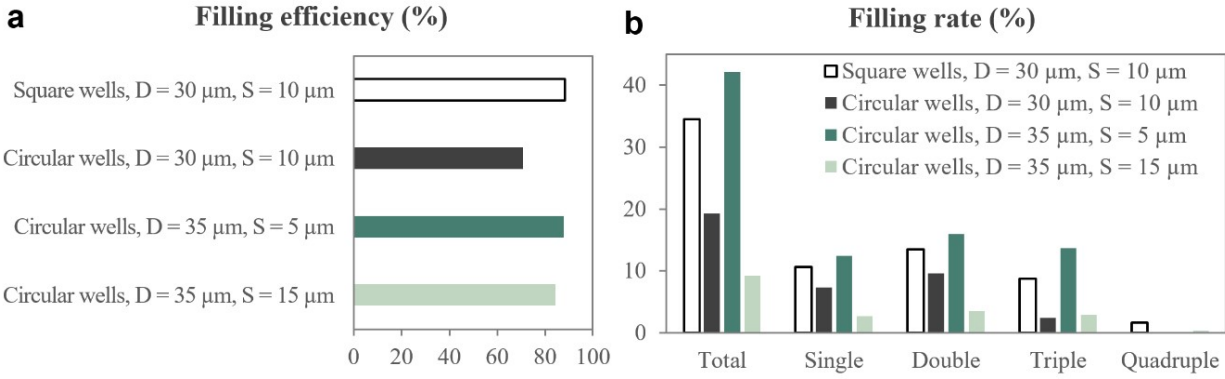

Fig. S7 293F cells capture in microwell arrays. (a) The filling efficiency of various well configurations. (b) Total-, single-, double-, triple- and quadruple-cell-per-well filling rates.



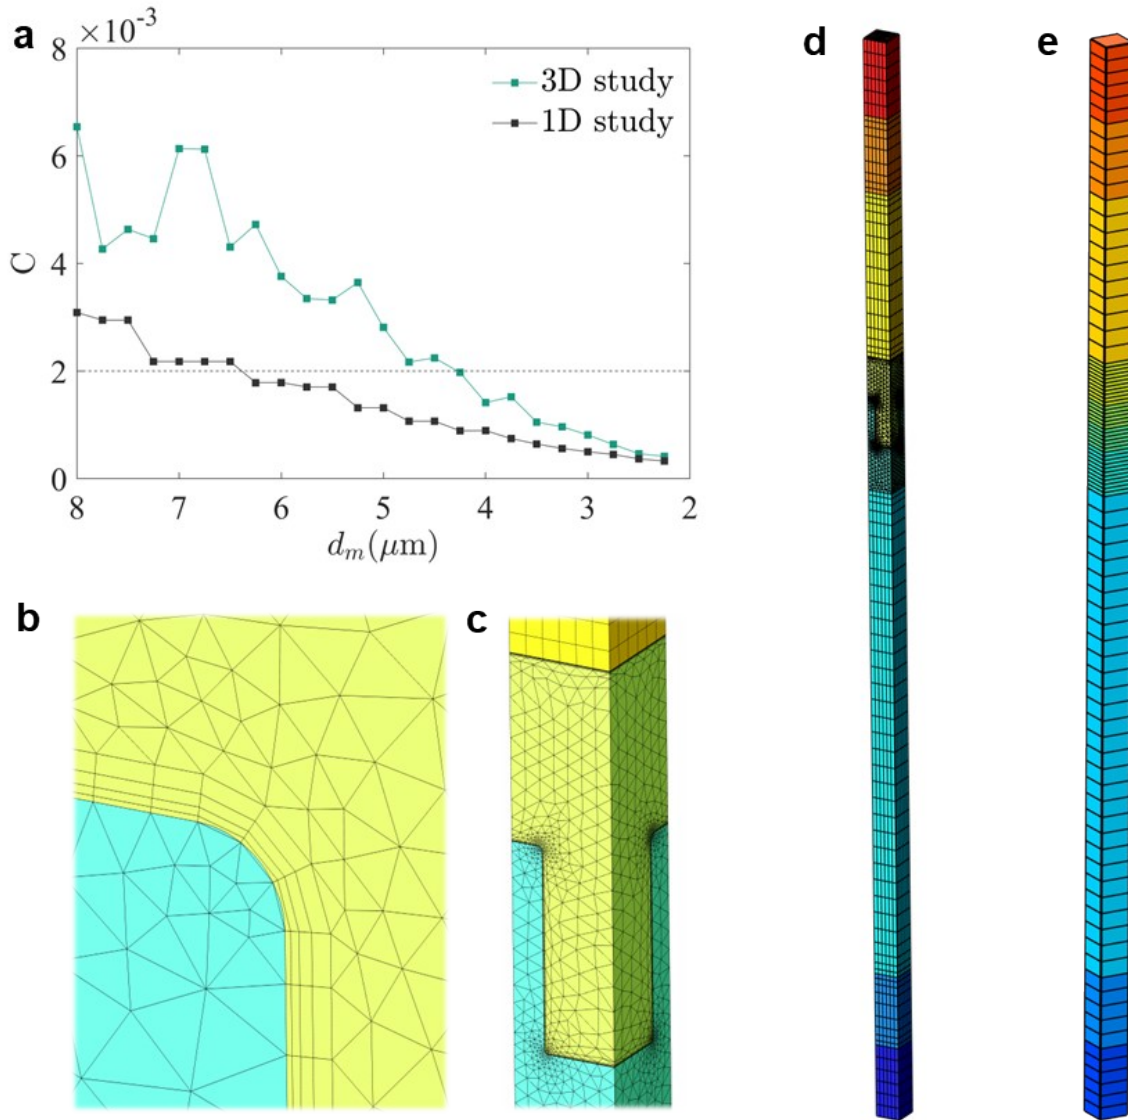

Fig. S8 Computational grid for the simulation domains (a) Mesh convergence study for the Gor'kov potential  $U_{rad}$  field in 3D and 1D studies. Dashed line indicates  $C = 0.002$  threshold. (b-d) Computational mesh for the 3D study. (d) Close-up of the computational mesh for the fluid domain, with (c) showing the mesh elements at the fluid/solid boundary. (e) Computational grid for the 1D study.

## Supplementary Movies

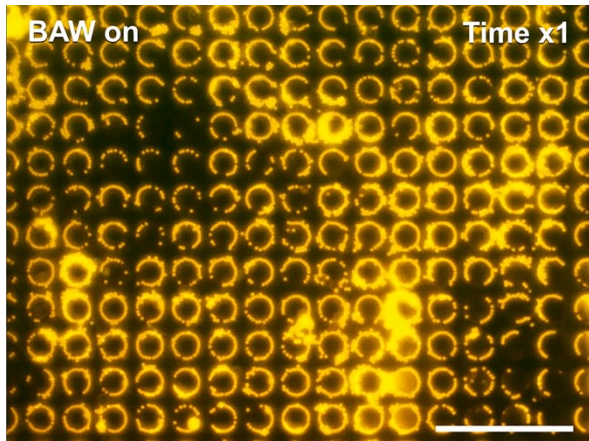

Movie S1 5  $\mu\text{m}$  fluorescent particles focusing in well array with diameter  $D = 35$  and spacing  $S = 15$   $\mu\text{m}$ . Scale bar is 200  $\mu\text{m}$ .

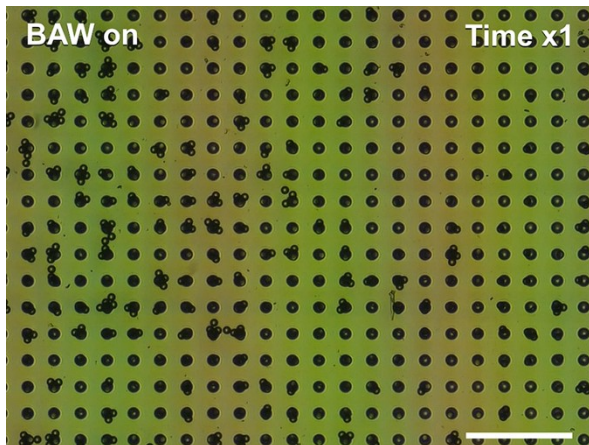

Movie S2 15  $\mu\text{m}$  PMMA particles isolation with one particle per well in well array with diameter  $D = 20$  and spacing  $S = 30$   $\mu\text{m}$ . Scale bar is 200  $\mu\text{m}$ .

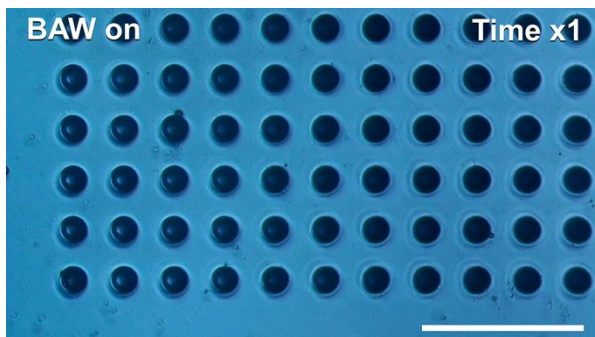

Movie S3 15  $\mu\text{m}$  PMMA particles focusing in well array with diameter  $D = 30$  and spacing  $S = 30$   $\mu\text{m}$ . Scale bar is 200  $\mu\text{m}$ .

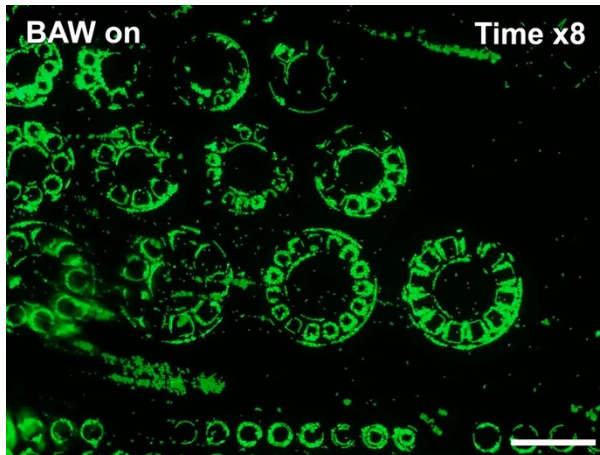

Movie S4 10  $\mu\text{m}$  green fluorescent PS particles arrangement in bio-mimicking shapes. Scale bar is 500  $\mu\text{m}$ .

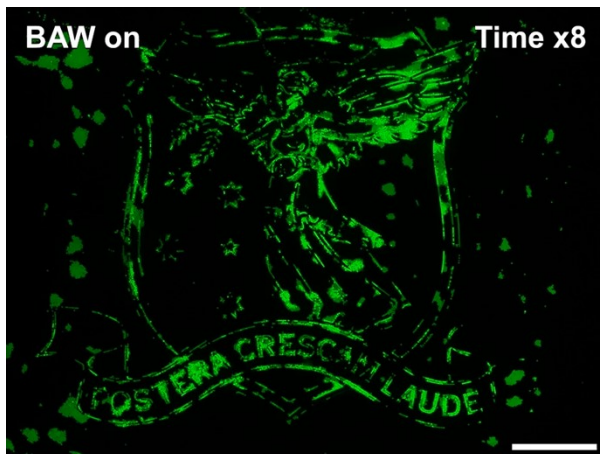

Movie S5 10  $\mu\text{m}$  green fluorescent PS particles subsequent release and capture in shape of the University of Melbourne logo. Scale bar is 500  $\mu\text{m}$ .

## Supplementary Notes

### Note S1.

#### Governing equations

The piezoelectric actuator is driven by a time-harmonic ac-voltage  $V = V_1 e^{i\omega t}$  of amplitude  $V_1$  and angular frequency  $\omega = 2\pi f$ , where  $f$  is the oscillation frequency. According to perturbation theory, physical fields can be decomposed to initial, first and second-order terms  $g = g_0 + g_1 + g_2$ , where 0-order term is the initial (background) condition. The first-order fields are time-dependent harmonic oscillations  $g_1(r,t) = \bar{g}_1(r) e^{i\omega t}$  where  $\bar{g}(r)$  is the complex valued amplitude. In the first step we solve the first order (linear) equations to generate maps of the acoustic potential fields. By utilizing the phase-dependent factor  $e^{i\omega t}$ , the time dependent solution can be produced.

The LiNbO<sub>3</sub> piezoelectric substrate was modelled with solid mechanics and electromechanical coupling. We introduce a Cartesian material coordinate system (X, Y, Z) to define constitutive equations and material properties for 128° rotated Y-cut LiNbO<sub>3</sub>. Constitutive equations to describe the substrate relate the mechanical stress tensor  $\sigma_1$  and the electric displacement field  $D_1$  with the elastic displacement field  $u_1$  and the electric potential  $\varphi_1$ . In the Voigt representation they are given by

$$\begin{pmatrix} \sigma_X \\ \sigma_Y \\ \sigma_Z \\ \sigma_{YZ} \\ \sigma_{XZ} \\ \sigma_{XY} \\ D_X \\ D_Y \\ D_Z \end{pmatrix} = \begin{pmatrix} C_{11} & C_{12} & C_{13} & C_{14} & 0 & 0 & 0 & -e_{21} & -e_{31} \\ C_{12} & C_{22} & C_{23} & C_{24} & 0 & 0 & 0 & -e_{22} & -e_{32} \\ C_{13} & C_{23} & C_{33} & C_{34} & 0 & 0 & 0 & -e_{23} & -e_{33} \\ C_{14} & C_{24} & C_{34} & C_{44} & 0 & 0 & 0 & -e_{24} & -e_{34} \\ 0 & 0 & 0 & 0 & C_{55} & C_{56} & -e_{15} & 0 & 0 \\ 0 & 0 & 0 & 0 & C_{56} & C_{66} & -e_{16} & 0 & 0 \\ 0 & 0 & 0 & 0 & e_{15} & e_{16} & \epsilon_{11} & 0 & 0 \\ e_{21} & e_{22} & e_{23} & e_{24} & 0 & 0 & 0 & \epsilon_{22} & \epsilon_{23} \\ e_{31} & e_{32} & e_{33} & e_{34} & 0 & 0 & 0 & \epsilon_{23} & \epsilon_{33} \end{pmatrix} \begin{pmatrix} \partial_X u_X \\ \partial_Y u_Y \\ \partial_Z u_Z \\ \partial_Z u_Z + \partial_Y u_Y \\ \partial_Z u_Z + \partial_X u_X \\ \partial_Y u_Y + \partial_X u_X \\ -\partial_X \varphi \\ -\partial_Y \varphi \\ -\partial_Z \varphi \end{pmatrix}, \quad (2)$$

where  $C_{ij}$  are the elastic constants,  $\epsilon_{ij}$  are the electric permittivities, and  $e_{ij}$  are the piezoelectric coupling constants. We introduce damping in the system through complex-valued elastic coefficients<sup>1</sup>

$$C_{ij} = C'_{ij} + iC''_{ij} = C'_{ij}(1 + i\eta), \quad \eta = \frac{1}{Q_m}, \quad (3)$$

where  $\eta$  is isotropic loss factor,  $Q_m$  is mechanical quality factor. Cauchy equation and Gauss's law for the piezoelectric substrate (without free charges) take form

$$\nabla \cdot \sigma_1 = -\rho_0 \omega^2 u_1, \quad (4)$$

$$\nabla \cdot D_1 = 0, \quad (5)$$

where  $\rho_0$  is the mass density. The actuation of the piezoelectric electrodes is simulated using a terminal boundary condition with zero voltage on the bottom electrode and harmonic voltage with amplitude  $V_1 = 20$  V on the top one.

We model the remaining non-piezoelectric solid domains (PDMS, glass, SU-8) as isotropic elastic materials. Constitutive equations for these domains include the Cauchy equation (4) and Hooke's Law, with

$$\begin{pmatrix} \sigma_x \\ \sigma_y \\ \sigma_z \\ \sigma_{yz} \\ \sigma_{xz} \\ \sigma_{xy} \end{pmatrix} = \begin{pmatrix} C_{11} & C_{12} & C_{12} & 0 & 0 & 0 \\ C_{12} & C_{11} & C_{12} & 0 & 0 & 0 \\ C_{12} & C_{12} & C_{11} & 0 & 0 & 0 \\ 0 & 0 & 0 & C_{44} & 0 & 0 \\ 0 & 0 & 0 & 0 & C_{44} & 0 \\ 0 & 0 & 0 & 0 & 0 & C_{44} \end{pmatrix} \begin{pmatrix} \partial_x u_x \\ \partial_y u_y \\ \partial_z u_z \\ \partial_z u_z + \partial_y u_y \\ \partial_z u_z + \partial_x u_x \\ \partial_y u_y + \partial_x u_x \end{pmatrix}. \quad (6)$$

Considering mechanical damping through equation (3), storage modulus  $C'_{ij}$  in turn can be characterized by the longitudinal  $c_L$  and transverse  $c_T$  sound speeds, or Young's modulus  $E$  and the Poisson's ratio  $\nu$ , with

$$C'_{11} = c_L^2 \rho_0 = \frac{E(1-\nu)}{(1+\nu)(1-2\nu)}, \quad (7)$$

$$C'_{44} = c_T^2 \rho_0 = \frac{E}{(1+\nu)}, \quad (8)$$

$$C'_{12} = C'_{11} - C'_{44}. \quad (9)$$

A symmetry boundary condition was further applied on all side walls using

$$u_1 \cdot n = 0. \quad (10)$$

where  $n$  is the unit normal with respect to the boundary.

In the fluid domains (water, silicone oil), a set of linearized governing equations of continuity, energy, and momentum conservation is considered, with

$$\frac{\partial \rho_1}{\partial t} = -\rho_0 \nabla \cdot v_1, \quad (11)$$

$$\frac{\partial T_1}{\partial t} = \nabla \cdot (D_T \nabla T_1) + \frac{\alpha T_0}{\rho_0 C_p} \frac{\partial \rho_1}{\partial t}, \quad (12)$$

$$\rho_0 \frac{\partial v_1}{\partial t} = -\nabla p_1 + \beta \mu \nabla (\nabla \cdot v_1) + \mu \nabla^2 v_1, \quad (13)$$

where  $\rho_0$  is the mass density,  $\rho_1$ ,  $v_1$ ,  $T_1$ ,  $p_1$  are 1st-order harmonic perturbation of density, velocity, temperature and pressure respectively,  $D_T$  is the thermal diffusivity of the liquid,  $\alpha$  is the isobaric thermal expansion coefficient relating density change with temperature,  $T_0 = 293.15 \text{ K}$  is the ambient temperature,  $C_p$  is the specific heat capacity at constant pressure,  $\beta$  is the viscosity ratio,

relating the bulk ( $\mu'$ ) and dynamic ( $\mu$ ) viscosities,<sup>2</sup> with  $\beta = \frac{\mu'}{\mu} + \frac{1}{3}$ . The equation of states formulates the constitutive relation between density, pressure and temperature:

$$\rho_1 = \frac{p_1}{c^2} - \rho_0 \alpha T_1, \quad (14)$$

where  $c$  is the sound speed. Since the silicone oil domain is facing a PML, we neglect heat transfer and viscous dissipation for this medium.

At the solid-fluid boundary the velocity was set to be continuous, with

$$v_1 = -i\omega u_1. \quad (15)$$

A slip boundary condition was also applied on the outer side walls of the fluid domains to simulate a periodic array (symmetry condition), where

$$v_1 \cdot n = 0. \quad (16)$$

Finally, adiabatic boundary conditions on the fluid domain boundaries completes the numerical model, with

$$n \cdot (D_T \nabla T_1) = 0. \quad (17)$$

We use a PML on the top and the bottom walls to mimic non-reflecting boundaries as shown in Fig. S1b,c. The PML acts as an artificial absorbing domain by imposing a complex-valued coordinate displacement in the  $z$  direction (polynomial stretching), with

$$\Delta z = \lambda \hat{z}(1 - i) - h_{PML} \hat{z}, \quad (18)$$

where  $\lambda$  is acoustic wavelength,  $\hat{z}$  is a local dimensionless coordinate, which varies from 0 to 1 over the PML height, where we set  $h_{PML} = \lambda/2$  as the PML height.

Particles suspended in the fluidic channel are subject to a time-averaged acoustophoretic radiation force  $F^{rad}$ . For a spherical particle with diameter  $d_b$ , this is given by Gor'kov,<sup>3</sup> with

$$F^{rad} = -\nabla U^{rad}, \quad U^{rad} = V_{ps} \left( \frac{1}{2} f_1 k_w \langle p^2 \rangle - \frac{3}{4} f_2 \rho_{w,0} \langle v^2 \rangle \right) \\ V_{ps} = \frac{\pi}{6} d_{ps}^3, \quad f_1 = 1 - \frac{k_{ps}}{k_w}, \quad f_2 = \frac{2(\rho_{ps} - \rho_{0,w})}{2\rho_{ps} + \rho_{0,w}}, \quad k_w = \frac{1}{\rho_{w,0} c_w^2}, \quad (19)$$

where  $U^{rad}$  is the Gor'kov potential,  $V_{ps}$  is a bead volume,  $f_1$  and  $f_2$  are monopole and dipole coefficients,  $k$  is compressibility,  $\rho$  is density, and the superscripts  $w$  and  $ps$  denotes water and polystyrene beads respectively. The bracketed quantities denote the time average over one oscillation period of the complex time-harmonic, where for fields  $A$  and  $B$ ,  $\langle AB \rangle = 0.5 \text{Re}(A^* B)$ , where the asterisk denotes complex conjugation. The expression (19) is valid for small particles compared to the fluidic wavelength, with  $d_{ps} \ll \lambda_f$ . At 7 MHz the fluidic wavelength is  $\lambda_f \sim 200$   $\mu\text{m}$ , where this expression is appropriate for the 5-15  $\mu\text{m}$  diameter beads used in this study.

Since the Navier–Stokes governing equation are non-linear, harmonic actuation generates higher order responses. Following the perturbation theory, the second order time-averaged fields in the fluid domain  $\langle g_2(r,t) \rangle$  can be calculated:

$$-\nabla \cdot \langle \rho_1 v_1 \rangle = \rho_0 \nabla \cdot v_2, \quad (20)$$

$$\rho_0 \langle (v_1 \cdot \nabla) v_1 \rangle + \left\langle \rho_1 \frac{\partial v_1}{\partial t} \right\rangle = -\nabla \langle p_2 \rangle + \beta \mu \nabla (\nabla \cdot v_2) + \mu \nabla^2 v_2. \quad (21)$$

Hence the first-order fields drive the second-order time-averaged fields, termed acoustic streaming. To appropriately model the interaction of flowing fluid with structures, non-slip boundary conditions are applied at fluid-solid interfaces:

$$v_2 = 0, \quad (22)$$

and a slip boundary condition (symmetry condition) on the outer side walls (in the fluid domain):

$$v_2 \cdot n = 0. \quad (23)$$

## Note S2.

### Mesh study

A hybrid computational mesh was used in the study, where fluid and SU-8 domains have a tetrahedral mesh and other domains have swept triangular prism mesh. A mesh convergence study was conducted using the approach from Devendran et al.<sup>4</sup> and Muller et al..<sup>5</sup> A convergence function  $\mathcal{C}(g)$  can be written as follows:

$$C(g) = \sqrt{\frac{\int (U_g^{rad} - U_{ref}^{rad})^2 dx dy dz}{\int (U_{ref}^{rad})^2 dx dy dz}}, \quad (24)$$

where  $g$  is the current solution,  $U_{ref}^{rad}$  is a reference solution. Current and reference solutions have mesh element size of  $d_m$  and  $d_{m,ref}$  respectively in the fluid and SU-8 domains with additional mesh refinement in the fluid boundary layer. Other domains have mesh elements not exceeding  $4d_m$ . The mesh study was performed for wells with diameter  $D = 20 \mu\text{m}$  and spacing of  $S = 20 \mu\text{m}$  at 5.56 MHz excitation. Fig. S8a. shows Gor'kov potential convergence in the fluid domain. Convergence threshold of  $C < 0.002$  realized in a computational meshes with  $d_m = 4.25 \mu\text{m}$  used in this study (Fig. S8b-d and Fig. S8e.).

### Note S3.

#### Half-wave resonance condition

The space between the piezoelectric substrate and glass coverslip can be treated as a half-wavelength resonator bounded by these two high acoustic impedance materials. This resonator comprises three layers and two materials, namely a uniform SU-8 photoresist layer, hybrid (cavity) layer and a water channel domain. The LiNbO<sub>3</sub>/SU-8 and water/glass boundaries have high acoustic reflection due to strong acoustic impedance mismatch between the adjacent media. The half-wave resonance condition for such a multi-layered resonator can be derived using

$$f_{0.5} = \frac{0.5}{\sum_i \frac{h_i}{c_i}}, \quad (25)$$

where  $h$  and  $c$  are the height and speed of sound of the resonator components and  $f_{0.5}$  is the half-wave resonance frequency. We define the effective speed of sound in the welled hybrid layer as an average of SU-8 and water properties considering their relative volume fraction

$$c_{hyb} = (c_{0,w} - c_{L,s}) \frac{\pi}{4} \left( \frac{D}{S+D} \right)^2 + c_{L,s}, \quad (26)$$

where  $c_{L,s}$  is longitudinal sound speed of SU-8 defined by (7).

## Supplementary Tables

Table S1. Material properties used in the computational study

| Material / Property                                | Notation                            | Value                                   |
|----------------------------------------------------|-------------------------------------|-----------------------------------------|
| <b>Polydimethylsiloxane (PDMS) <sup>6 7</sup></b>  |                                     |                                         |
| Density                                            | $\rho_{0,p}$                        | 1070 kg m <sup>-3</sup>                 |
| Longitudinal wave speed                            | $c_{L,p}$                           | 1030 m s <sup>-1</sup>                  |
| Transverse (shear) wave speed                      | $c_{T,p}$                           | 100 m s <sup>-1</sup>                   |
| Loss factor                                        | $\eta_p$                            | 0.001                                   |
| <b>Pyrex (borosilicate) glass <sup>7</sup></b>     |                                     |                                         |
| Density                                            | $\rho_{0,g}$                        | 2230 kg m <sup>-3</sup>                 |
| Longitudinal speed of sound                        | $c_{L,g}$                           | 5591 m s <sup>-1</sup>                  |
| Transverse speed of sound                          | $c_{T,g}$                           | 3424m s <sup>-1</sup>                   |
| Loss factor                                        | $\eta_g$                            | 0.001                                   |
| <b>Water <sup>4</sup></b>                          |                                     |                                         |
| Density                                            | $\rho_{0,w}$                        | 997 kg m <sup>-3</sup>                  |
| Sound speed                                        | $c_w$                               | 1497 m s <sup>-1</sup>                  |
| Dynamic viscosity                                  | $\mu$                               | 0.00089 Pa s                            |
| Bulk viscosity                                     | $\mu'$                              | 0.00247 Pa s                            |
| Viscous boundary layer                             | $\delta_v = \sqrt{2\mu/\rho\omega}$ | 0.2 $\mu\text{m}$                       |
| Thermal conductivity                               | $D_T$                               | 0.603 W m <sup>-1</sup> K <sup>-1</sup> |
| Specific heat capacity                             | $C_p$                               | 4183 J kg <sup>-1</sup> K <sup>-1</sup> |
| Thermal expansion coefficient                      | $\alpha$                            | 0.000297 K <sup>-1</sup>                |
| <b>SU-8 (3050)</b>                                 |                                     |                                         |
| Density <sup>8</sup>                               | $\rho_{0,s}$                        | 1153 kg m <sup>-3</sup>                 |
| Young's Modulus <sup>8</sup>                       | $E_s$                               | 2 Gpa                                   |
| Poisson ratio <sup>9</sup>                         | $\nu_s$                             | 0.35                                    |
| Loss factor <sup>9</sup>                           | $\eta_s$                            | 0.023                                   |
| <b>LiNbO<sub>3</sub> (COMSOL Material library)</b> |                                     |                                         |
| Density                                            | $\rho_{0,l}$                        | 4700 kg m <sup>-3</sup>                 |
| Elastic constants                                  | $C_{ij}$                            | See Table S2.                           |
| Piezoelectric coupling constants                   | $\varepsilon_{ij}$                  | See Table S2.                           |
| Permittivity constants                             | $e_{ij}$                            | See Table S2.                           |
| Quality factor (experimentally acquired)           | $Q_l$                               | 59                                      |
| Loss factor (experimentally acquired)              | $\eta_l$                            | 0.017                                   |
| <b>Silicone oil <sup>10</sup></b>                  |                                     |                                         |
| Density                                            | $\rho_{0,o}$                        | 947 kg m <sup>-3</sup>                  |
| Sound speed                                        | $c_o$                               | 1004 m s <sup>-1</sup>                  |
| <b>Polystyrene beads <sup>11</sup></b>             |                                     |                                         |
| Density                                            | $\rho_{ps}$                         | 1050 kg m <sup>-3</sup>                 |
| Compressibility                                    | $k_{ps}$                            | 249 Tpa <sup>-1</sup>                   |
| Diameter                                           | $d_{ps}$                            | 10 $\mu\text{m}$                        |

Table S2. Lithium Niobate LiNbO<sub>3</sub> constants



| Property                         | Notation                       | Value                   |
|----------------------------------|--------------------------------|-------------------------|
| Elastic constants                | $C_{11}, C_{22}$               | 202.90 GPa              |
|                                  | $C_{12}$                       | 52.92 GPa               |
|                                  | $C_{13}, C_{23}$               | 74.91 GPa               |
|                                  | $C_{14}$                       | 9.00 GPa                |
|                                  | $C_{24}$                       | -9.00 GPa               |
|                                  | $C_{33}$                       | 243.08 GPa              |
|                                  | $C_{34}$                       | 0                       |
|                                  | $C_{44}, C_{55}$               | 59.90 GPa               |
|                                  | $C_{56}$                       | 8.99 GPa                |
|                                  | $C_{66}$                       | 74.88 GPa               |
| Piezoelectric coupling constants | $e_{21}, e_{16}$               | -2.54 C m <sup>-2</sup> |
|                                  | $e_{22}$                       | 2.54 C m <sup>-2</sup>  |
|                                  | $e_{23}, e_{34}$               | 0                       |
|                                  | $e_{24}, e_{15}$               | 3.70 C m <sup>-2</sup>  |
|                                  | $e_{31}, e_{32}$               | 0.19 C m <sup>-2</sup>  |
|                                  | $e_{33}$                       | 1.31 C m <sup>-2</sup>  |
| Permittivity constants           | $\epsilon_{11}, \epsilon_{22}$ | 43.6                    |
|                                  | $\epsilon_{23}$                | 0                       |
|                                  | $\epsilon_{33}$                | 29.16                   |

## References

- 1 P. Hahn, O. Schwab and J. Dual, *Lab Chip*, 2014, **14**, 3937–3948.
- 2 J. S. Bach and H. Bruus, *J Acoust Soc Am*, 2018, **144**, 766–784.
- 3 L. P. Gor'kov, in *Sov. Phys. Dokl.*, 1962, vol. 6, pp. 773–775.
- 4 C. Devendran, T. Albrecht, J. Brenker, T. Alan and A. Neild, *Lab Chip*, 2016, **16**, 3756–3766.
- 5 P. B. Muller, R. Barnkob, M. J. H. Jensen and H. Bruus, *Lab Chip*, 2012, **12**, 4617–4627.
- 6 Z. Ni, C. Yin, G. Xu, L. Xie, J. Huang, S. Liu, J. Tu, X. Guo and D. Zhang, *Lab Chip*, 2019, **19**, 2728–2740.
- 7 N. R. Skov and H. Bruus, *Micromachines (Basel)*, 2016, **7**, 1–14.
- 8 Microchem, *Product Datasheet*, , DOI:10.1146/annurev.matsci.28.1.153.
- 9 S. Chung and S. Park, *Journal of Mechanical Science and Technology*, 2013, **27**, 2701–2707.
- 10 I. Leibacher, P. Reichert and J. Dual, *Lab Chip*, 2015, **15**, 2896–2905.
- 11 M. Tayebi, R. O'Rorke, H. C. Wong, H. Y. Low, J. Han, D. J. Collins and Y. Ai, *Small*, 2020, **2000462**, 1–9.
